# Supplementary material for: Characteristics of a novel cell line ZJU-0430 established from human gallbladder carcinoma
Source: Springer Nature journal article supplement (doi:10.1186/s12935-019-0911-1), 2019-07-22

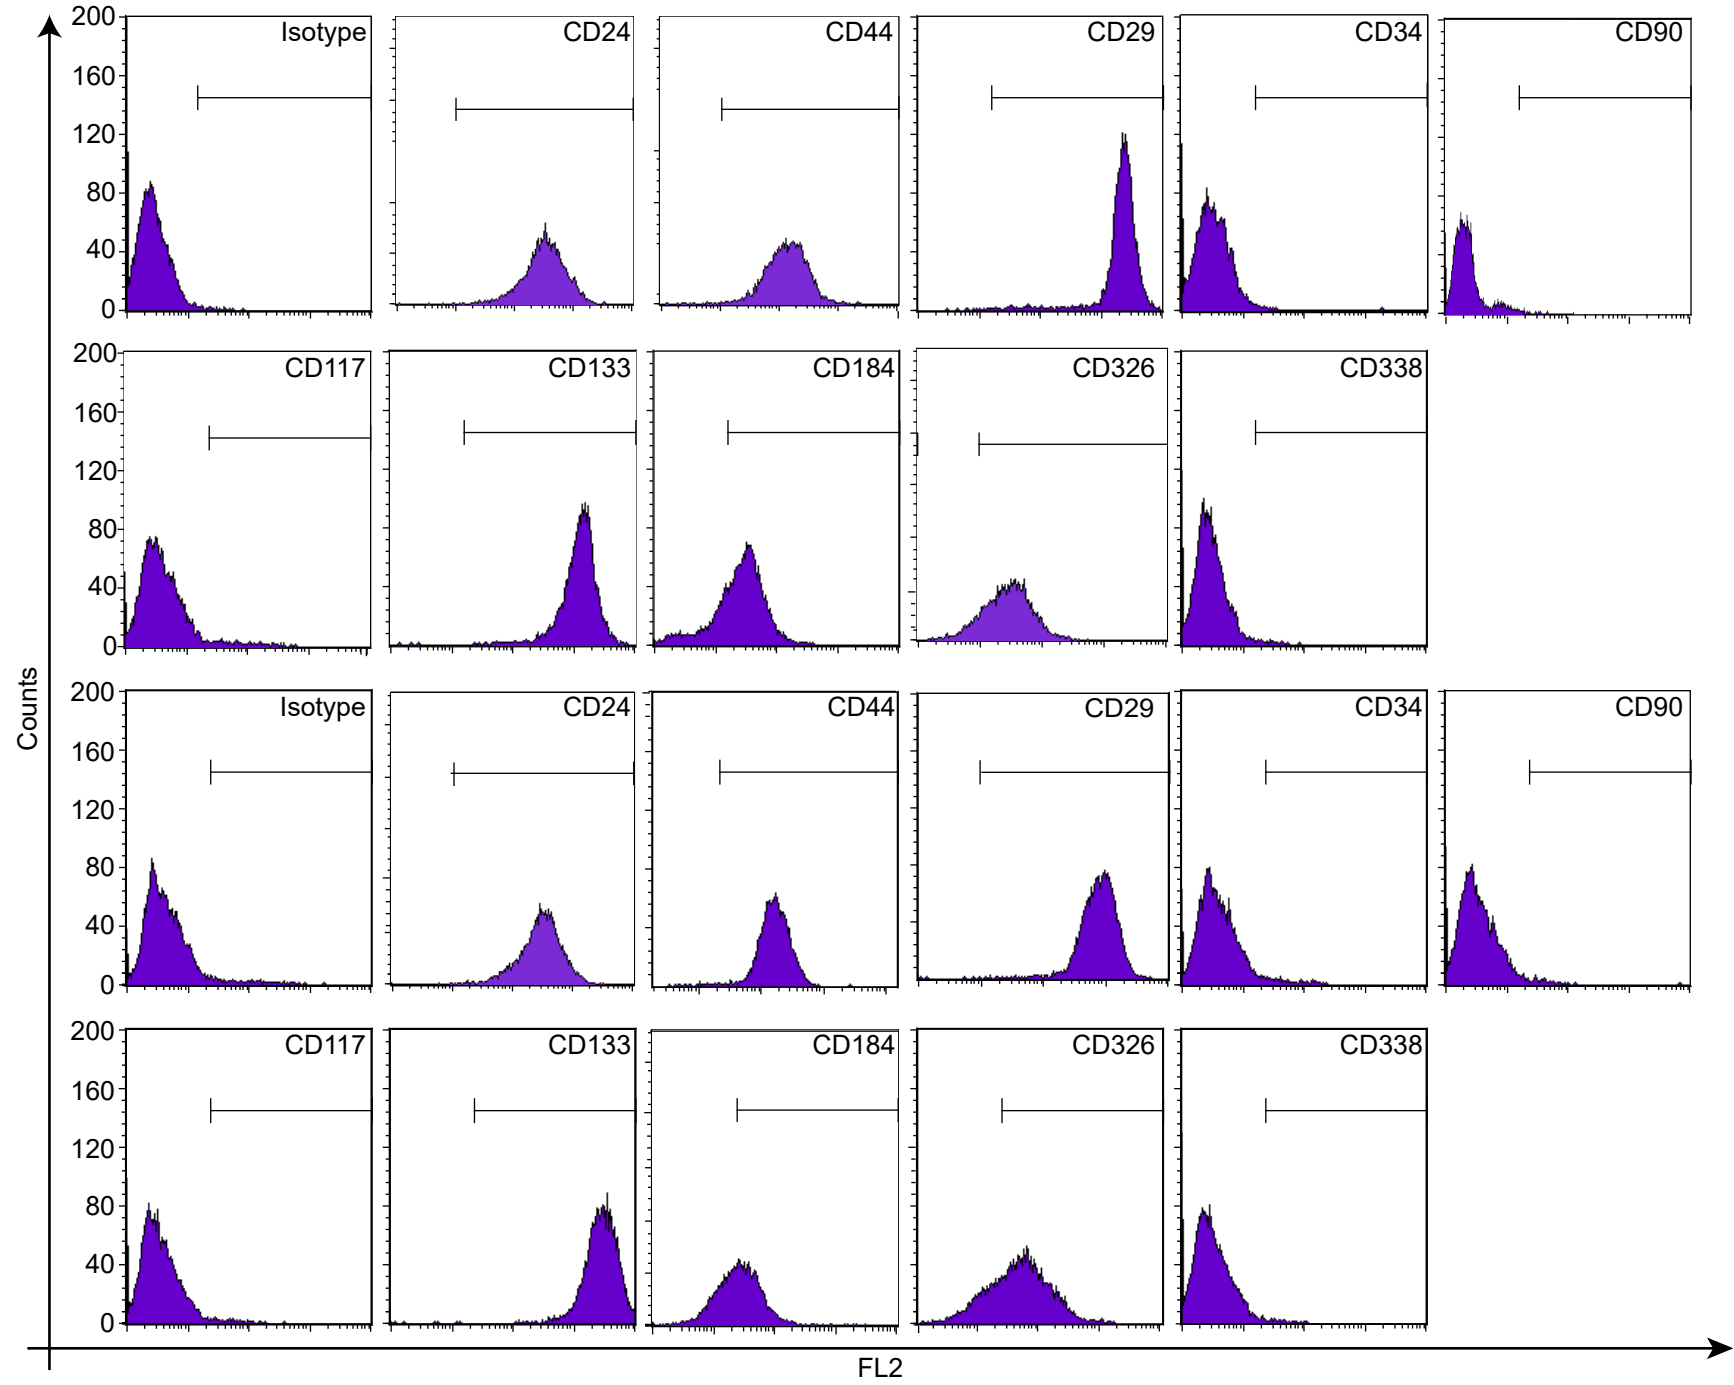

Supplement: MOESM3 [file 16970484]
