# Supplementary material for: Characteristics of a novel cell line ZJU-0430 established from human gallbladder carcinoma
Source: Springer Nature journal article supplement (doi:10.1186/s12935-019-0911-1), 2019-07-22

CK20

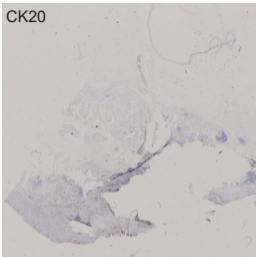

CAD17

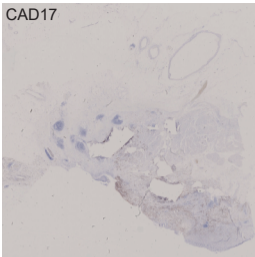

CDX2

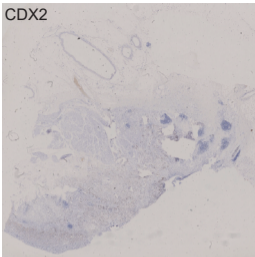

$\beta$ -catenin

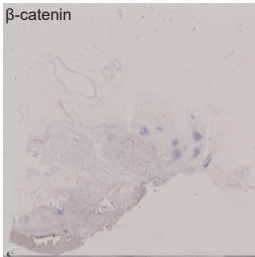

SATB2

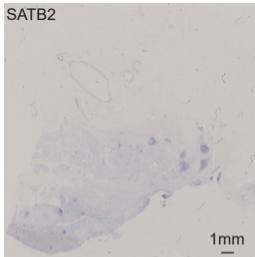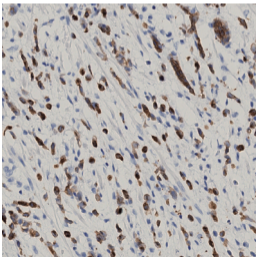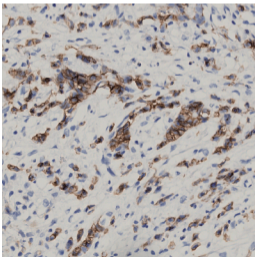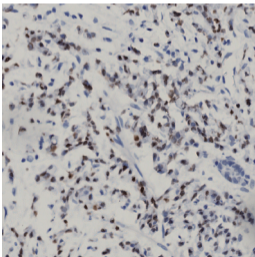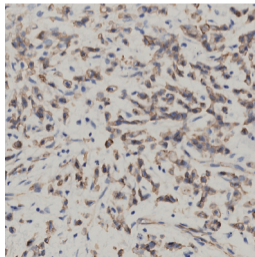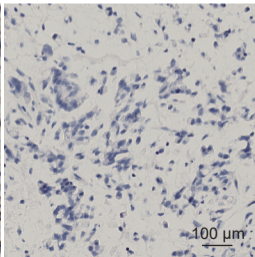

Supplement: MOESM4 [file 16970484]
