# Supplementary material for: Characteristics of a novel cell line ZJU-0430 established from human gallbladder carcinoma
Source: Cancer Cell Int. 2019 Jul 22;19:190. doi: 10.1186/s12935-019-0911-1 (PMC6647153; doi:10.1186/s12935-019-0911-1)
Supplement: Supplementary file 5 — Additional file 5: Figure S3. Characteristic of ZJU-0430 cell line in by scRNA-Seq data. (a) tSNE plot of ZJU-0430 cell line clusters defined by Seurat pipline before merging similar sub cell clusters. (b) UMAP plot of ZJU-0430 cell line clusters as showed in (a). (c) Dot heatmap of CD24, CD44, CD29, CD133 expression in each cell clusters. Heatmap showed the expression pattern of genes associated with Wnt signaling pathway (d), extracellular exosome (e), apoptotic signaling pathway (f) and nuclear transcribed mRNA catabolic process nonsense mediated (g). [file 12935_2019_911_MOESM5_ESM.pdf]

A t-SNE plot showing the distribution of 10 clusters of cells. The x-axis is labeled 'tSNE\_1' and ranges from -40 to 40. The y-axis is labeled 'tSNE\_2' and ranges from -25 to 25. The clusters are numbered 0 through 9 and are color-coded: 0 (red), 1 (orange), 2 (green), 3 (light green), 4 (cyan), 5 (blue), 6 (dark blue), 7 (purple), 8 (magenta), and 9 (pink). The clusters are distributed across the plot, with some clusters (like 0, 1, 2, 3, 4, 5, 6, 7, 8, 9) forming a large, dense cloud, while cluster 9 is a small, distinct cluster on the right side.

Heatmap showing the expression of 100 genes across 10 cell lines (HEP2, H1299, H1975, H460, H1975, H1975, H1975, H1975, H1975, H1975). The color scale ranges from 0 (blue) to 100 (red). The genes are listed on the y-axis, and the cell lines are listed on the x-axis. The heatmap shows that the expression of these genes varies significantly across the different cell lines.

Heatmap visualization showing gene expression levels across three conditions: C1, C2, and C3. The y-axis lists genes: RPLP1, RPLP9, RPLP1, RPS12, RPL12, PABPC1, RPL28, and UBRAC1. A color scale indicates expression from -3 (purple) to 2 (yellow).
